# Supplementary material for: Optimization of SnPd Shell Configuration to Boost ORR Performance of Pt-Clusters Decorated CoOx@SnPd Core-Shell Nanocatalyst
Source: MDPI journal article supplement (doi:10.3390/catal12111411), 2022-11-11
Supplement: s1 [file s1]

# Optimization of SnPd Shell Configuration to Boost ORR Performance of Pt-Clusters

## Decorated $\text{CoO}_x$ @SnPd Core-Shell Nanocatalyst

### 1. The HRTEM image of CSP nanocatalyst.

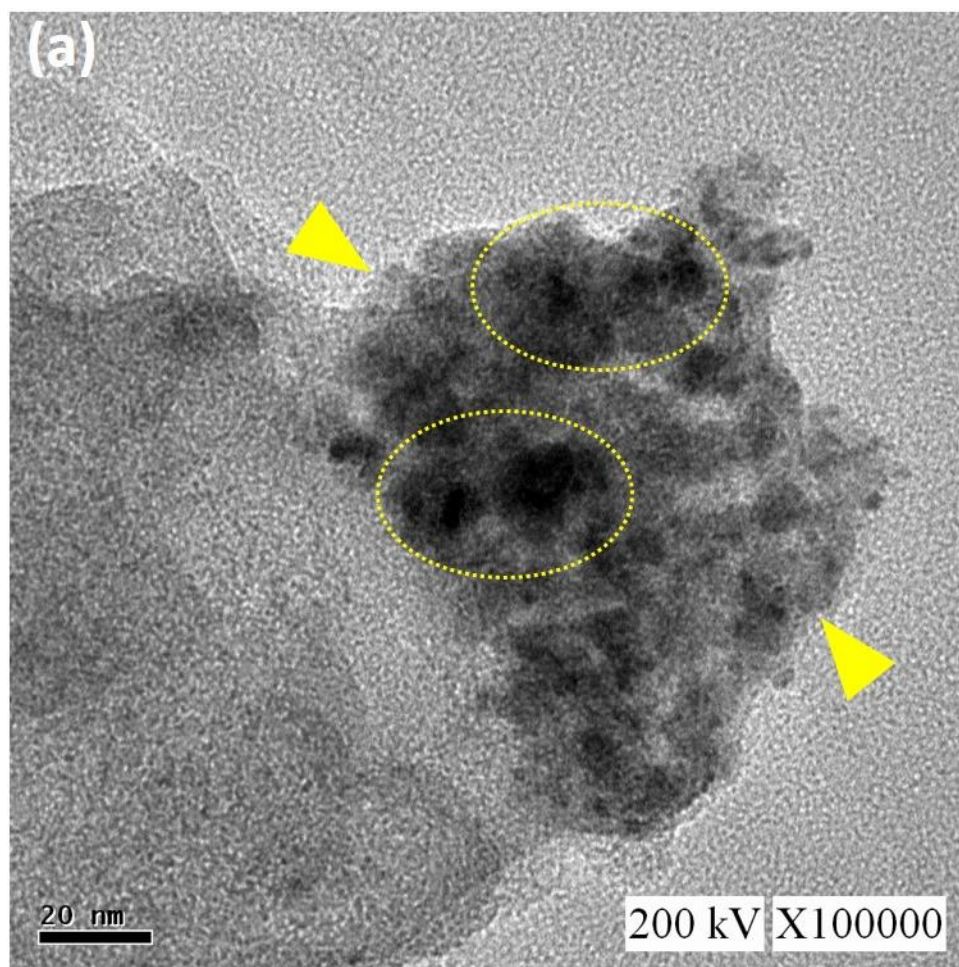

**Figure S1.** The HRTEM image of CSP nanocatalyst.

## 2. XRD results of control samples

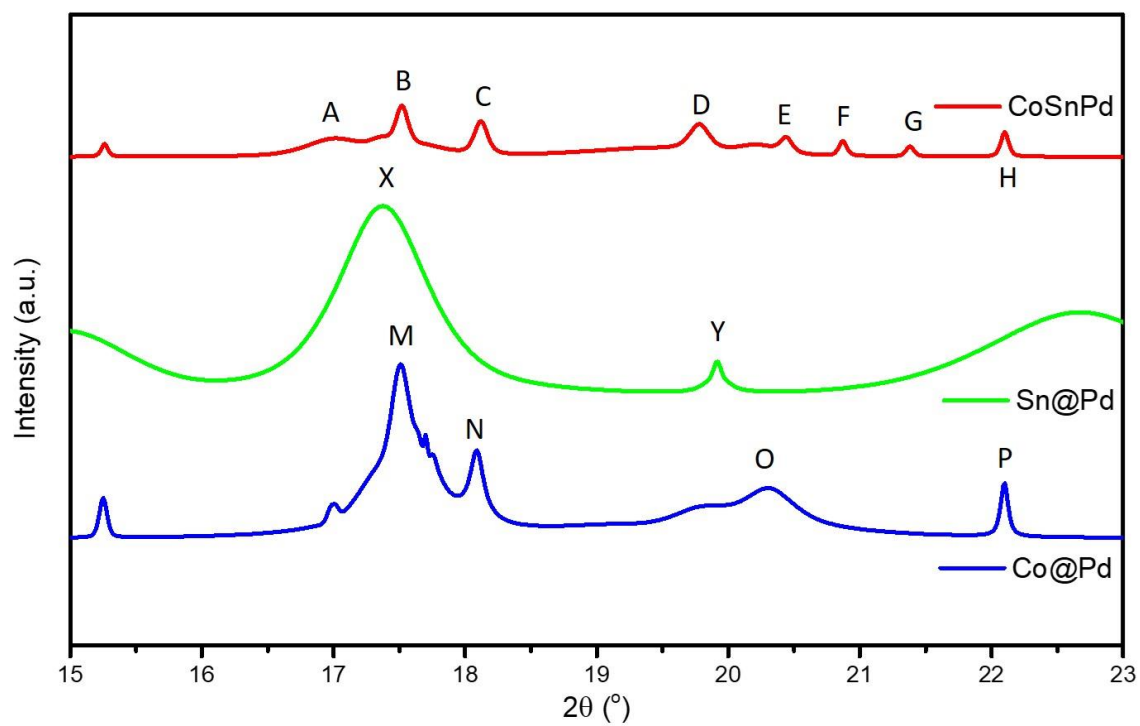

**Figure S2.** X-ray diffraction patterns of control samples. All the spectra were measured under the incident X-rays of 18 keV.

### 3. The ORR performance of reference sample (CSP) with CSPP NCs.

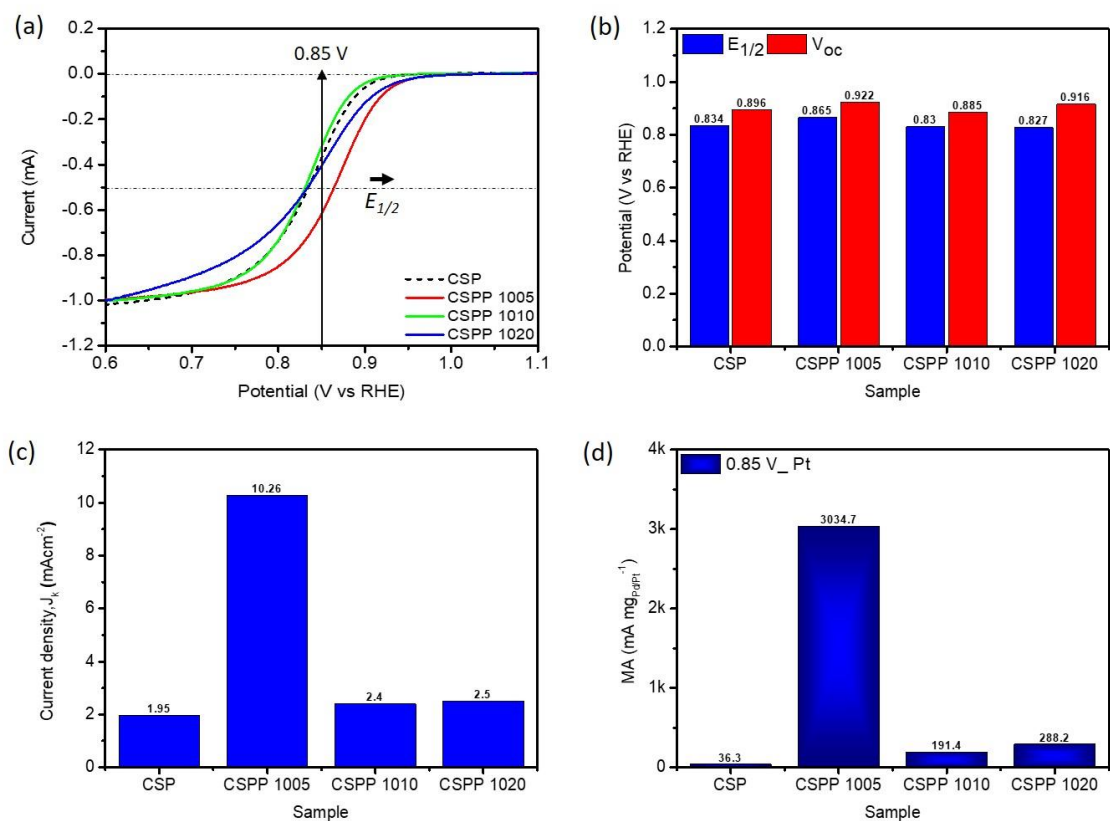

**Figure S3.** Electrochemical results of CSPP NCs. (a) LSV, (b) Onset potential ( $V_{oc}$ ) / half wave potential ( $E_{1/2}$ ), (c) kinetic current density and (d) ORR mass activity of CSPP NCs compared with reference sample (CSP).

**Table S1.** The ICP-AES determined atomic composition of CSPP NCs.

| Samples   | Composition (%) |       |       |       |        |
|-----------|-----------------|-------|-------|-------|--------|
|           | Co              | Sn    | Pd    | Pt    | C      |
| CSPP 1005 | 10.07           | 12.65 | 5.47  | 0.829 | 70.981 |
| CSPP 1010 | 13.11           | 11.58 | 10.65 | 0.925 | 63.735 |
| CSPP 1020 | 14.53           | 8.69  | 15.23 | 0.878 | 60.672 |

**Table S2.** Benchmark of catalysts in ORR application

| Catalyst                                   | MA (mA <sub>mg</sub> <sup>-1</sup> ) | Electrolyte | Reference |
|--------------------------------------------|--------------------------------------|-------------|-----------|
| CSPP 1005                                  | 3034.7 @ 0.85 V                      | 0.1 M KOH   | This work |
| Ni@Pd-Ir (NPI-0025)                        | 2066 @ 0.85V                         |             | [1]       |
| CoPdPt                                     | 2056.3 @ 0.85 V                      |             | [2]       |
| Dealloyed-CoAuPd-1                         | 59.195 @ 0.8 V                       |             | [3]       |
| Dealloyed-CoAuPd-3                         | 81.559 @ 0.8 V                       |             |           |
| Pd <sub>6</sub> Ni icosahedra              | 220 @ 0.9 V                          |             | [4]       |
| Cu@Pd/Pt                                   | 414 @ 0.85V                          |             | [5]       |
| Ni@Pd <sub>3</sub>                         | 95 @ 0.85 V                          |             | [6]       |
| O-Pd <sub>6</sub> Sn <sub>3</sub> Co/C     | 134.8 @ 0.85 V                       |             | [7]       |
| Ordered Pd <sub>3</sub> Pb/C               | 168.9 @ 0.9 V                        |             | [8]       |
| PdMn/C-Pol                                 | 70 @ 0.85 V                          |             | [9]       |
| PdMn/C-BAE                                 | 93 @ 0.85 V                          |             |           |
| PdFe/C-Pol                                 | 27 @ 0.85 V                          |             |           |
| PdFe/C-BAE                                 | 81 @ 0.85 V                          |             |           |
| Pd/C-BAE                                   | 49 @ 0.85 V                          |             |           |
| AuPdCo/C intermetallic (800 °C)            | 130 @ 0.9 V                          |             | [10]      |
| Pd/W <sub>18</sub> O <sub>49</sub> hybrids | 216 @ 0.9 V                          |             | [11]      |

## References

1. Bhalothia, D.; Tsai, D.-L.; Wang, S.-P.; Yan, C.; Chan, T.-S.; Wang, K.-W.; Chen, T.-Y.; Chen, P.-C. Ir-oxide mediated surface restructure and corresponding impacts on durability of bimetallic NiO<sub>x</sub>@Pd nanocatalysts in oxygen reduction reaction. *J. Alloys Compd.* **2020**, *844*, 156160. <https://doi.org/10.1016/j.jallcom.2020.156160>.

2. Dai, S.; Chou, J.-P.; Wang, K.-W.; Hsu, Y.-Y.; Hu, A.; Pan, X.; Chen, T.-Y. Platinum-trimer decorated cobalt-palladium core-shell nanocatalyst with promising performance for oxygen reduction reaction. *Nat Commun* **2019**, *10*, 440. <https://doi.org/10.1038/s41467-019-08323-w>.
3. Luo, L.-M.; Zhan, W.; Zhang, R.-H.; Chen, D.; Hu, Q.-Y.; Guo, Y.F.; Zhou, X.-W. Ternary CoAuPd and binary AuPd electrocatalysts for methanol oxidation and oxygen reduction reaction: Enhanced catalytic performance by surface reconstruction. *Journal of Power Sources* **2019**, *412*, 142–152. <https://doi.org/10.1016/j.jpowsour.2018.11.044>.
4. Feng, Y.; Shao, Q.; Ji, Y.; Cui, X.; Li, Y.; Zhu, X.; Huang, X. Surface-modulated palladium-nickel icosahedra as high-performance non-platinum oxygen reduction electrocatalysts. *Sci. Adv.* **2018**, *4*, 7, <https://doi.org/10.1126/sciadv.aap8817>.
5. Chen, H.-Y.T.; Chou, J.-P.; Lin, C.-Y.; Hu, C.-W.; Yang, Y.-T.; Chen, T.-Y. Heterogeneous Cu-Pd binary interface boosts stability and mass activity of atomic Pt clusters in the oxygen reduction reaction. *Nanoscale*, **2017**, *9*, 7207–7216. <https://doi.org/10.1039/C7NR01224A>.
6. Jiang, J.; Gao, H.; Lu, S.; Zhang, X.; Wang, C.-Y.; Wang, W.-K.; Yu, H.-Q. Ni-Pd core-shell nanoparticles with Pt-like oxygen reduction electrocatalytic performance in both acidic and alkaline electrolytes. *J. Mater. Chem. A*, **2017**, *5*, 9233–9240. <https://doi.org/10.1039/C7TA01754E>.
7. Wu, Y.; Wang, C.; Zou, L.; Huang, Q.; Yang, H. Incorporation of cobalt into Pd<sub>2</sub>Sn intermetallic nanoparticles as durable oxygen reduction electrocatalyst. *J. Electroanal. Chem.* **2017**, *789*, 167–173.
8. Cui, Z.; Chen, H.; Zhao, M.; DiSalvo, F.J. High-Performance Pd<sub>3</sub>Pb Intermetallic Catalyst for Electrochemical Oxygen Reduction. *Nano Lett.* **2016**, *16*, 4, 2560–2566. <https://doi.org/10.1021/acs.nanolett.6b00121>.
9. Holade, Y.; da Silva, R.G.; Servat, K.; Napporn, T.W.; Canaff, C.; de Andrade, A.R.; Kokoh, K.B. Facile synthesis of highly active and durable PdM/C (M = Fe, Mn) nanocatalysts for the oxygen reduction reaction in an alkaline medium. *J. Mater. Chem. A*, **2016**, *4*, 8337–8349. <https://doi.org/10.1039/C6TA02096H>.
10. Kuttiyiel, K.A.; Sasaki, K.; Su, D.; Wu, L.; Zhu, Y.; Adzic, R.R. Gold-promoted structurally ordered intermetallic palladium cobalt nanoparticles for the oxygen reduction reaction. *Nat. Commun* **2014**, *5*, 5185. <https://doi.org/10.1038/ncomms6185>.
11. Lu, Y.; Jiang, Y.; Gao, X.; Wang, X.; Chen, W. Strongly Coupled Pd Nanotetrahedron/Tungsten Oxide Nanosheet Hybrids with Enhanced Catalytic Activity and Stability as Oxygen Reduction Electrocatalysts. *J. Am. Chem. Soc.* **2014**, *136*, 11687–11697. <https://doi.org/10.1021/ja5041094>.
